# Supplementary material for: Optimization of Alkaline Hydrogen Peroxide Pretreatment and Enzymatic Hydrolysis of Wheat Straw for Enhancing Sugar Yields
Source: MDPI journal article supplement (doi:10.3390/fermentation9100871), 2023-09-27
Supplement: s1 [file s1]

Archive with 1 entries (1 files):
- fermentation-2630838-supplementary.pdf
